# Supplementary material for: Recently fixed carbon fuels microbial activity several meters below the soil surface
Source: Copernicus journal article supplement (doi:10.5194/bg-2022-199), 2022-09-26
Supplement: Supplementary file 2 [file bg-2022-199-supplement.pdf]

# Supplement

## Recently fixed carbon fuels microbial activity several meters below the soil surface

5 Andrea Scheibe<sup>1</sup>, Carlos A. Sierra<sup>2,3</sup>, Marie Spohn<sup>\*1,4</sup>

<sup>1</sup>Bayreuth Center of Ecology and Environmental Research (BayCEER), University of Bayreuth, Germany

<sup>2</sup>Department of Biogeochemical Processes, Max Planck Institute for Biogeochemistry, Jena, Germany

<sup>3</sup>Department of Ecology, Swedish University of Agricultural Sciences, Uppsala, Sweden

10 <sup>4</sup>Department of Soil and Environment, Swedish University of Agricultural Sciences, Uppsala, Sweden

*Correspondence to:* Marie Spohn (marie.spohn@slu.se)

15

20

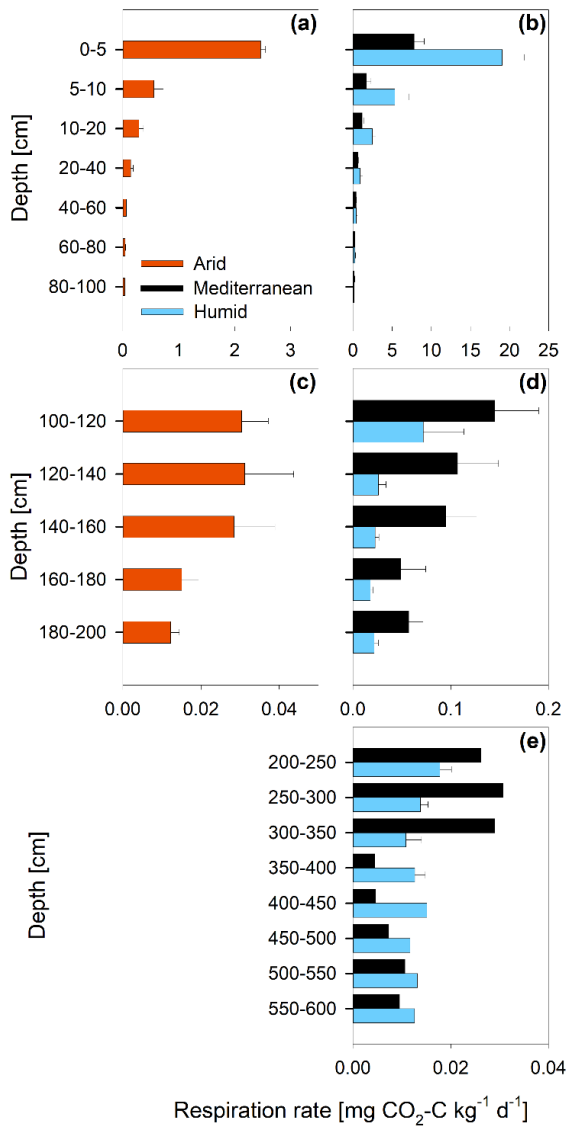

**Figure S1:** Soil respiration rate (mean  $\pm$  standard error) of soil depth increments down to (a, b) 100 cm, (c, d) 200 cm, and (e) 600 cm depth at three sites (arid, mediterranean, humid) located along a precipitation gradient in the Coastal Cordillera of Chile (0-200 cm: n = 3, except for humid site with n = 4; > 200 cm: n = 1, except for humid site 200-400 cm with n = 2).

25 **Table S1:** Percentage (% (w/w)) of soil fine fraction (<2 mm; mean  $\pm$  standard error) in soils at three sites (arid, mediterranean, humid) located along a precipitation gradient in the Coastal Cordillera of Chile (0–200 cm: n = 3, except for humid site with n = 4; 200–600 cm: n = 1, except for humid site 200–400 cm with n = 2).

| Depth [cm] | Fine fraction (< 2 mm) [%] |                 |                 |
|------------|----------------------------|-----------------|-----------------|
|            | Arid                       | Mediterranean   | Humid           |
| 0 - 5      | 87.2 $\pm$ 3.0             | 97.8 $\pm$ 1.5  | 92.7 $\pm$ 2.2  |
| 5 - 10     | 87.3 $\pm$ 2.0             | 98.4 $\pm$ 1.1  | 91.4 $\pm$ 1.9  |
| 10 - 20    | 83.5 $\pm$ 2.0             | 98.7 $\pm$ 1.1  | 91.1 $\pm$ 1.6  |
| 20 - 40    | 68.9 $\pm$ 9.5             | 99.3 $\pm$ 0.4  | 83.3 $\pm$ 10.0 |
| 40 - 60    | 59.7 $\pm$ 8.2             | 99.7 $\pm$ 0.03 | 87.0 $\pm$ 2.8  |
| 60 - 80    | 59.3 $\pm$ 6.7             | 99.6 $\pm$ 0.1  | 88.8 $\pm$ 3.9  |
| 80 - 100   | 59.2 $\pm$ 8.1             | 99.4 $\pm$ 0.1  | 78.3 $\pm$ 4.2  |
| 100 - 120  | 61.8 $\pm$ 5.8             | 98.6 $\pm$ 0.4  | 73.7 $\pm$ 10.8 |
| 120 - 140  | 54.1 $\pm$ 1.9             | 98.2 $\pm$ 0.7  | 77.3 $\pm$ 8.2  |
| 140 - 160  | 53.6 $\pm$ 4.8             | 97.6 $\pm$ 0.7  | 84.9 $\pm$ 2.7  |
| 160 - 180  | 50.7 $\pm$ 2.9             | 96.6 $\pm$ 1.2  | 88.7 $\pm$ 3.2  |
| 180 - 200  | 46.7 $\pm$ 0.8             | 96.1 $\pm$ 1.4  | 86.6 $\pm$ 1.9  |
| 200 - 250  |                            | 95.6            | 86.8 $\pm$ 2.5  |
| 250 - 300  |                            | 94.4            | 82.3 $\pm$ 0.9  |
| 300 - 350  |                            | 93.0            | 81.0 $\pm$ 2.6  |
| 350 - 400  |                            | 93.7            | 80.6 $\pm$ 3.3  |
| 400 - 450  |                            | 95.2            | 72.3            |
| 450 - 500  |                            | 96.0            | 77.2            |
| 500 - 550  |                            | 94.5            | 77.7            |
| 550 - 600  |                            | 96.2            | 71.9            |
